# Supplementary material for: Relationship between Dietary Decanoic Acid and Coronary Artery Disease: A Population-Based Cross-Sectional Study
Source: MDPI journal article supplement (doi:10.3390/nu15204308), 2023-10-10
Supplement: s1 [file s1]

Table S1. Distribution of variables with missing data comparing the raw data with the data by multiple imputation

|                        | 0                | 1                | 2                | 3                | 4                | 5                | P<br>value |
|------------------------|------------------|------------------|------------------|------------------|------------------|------------------|------------|
| Age, years             | 48.02 ±<br>16.83 | 1.0000     |
| Sex, %                 |                  |                  |                  |                  |                  |                  | 1.0000     |
| Male                   | 47.94            | 47.94            | 47.94            | 47.94            | 47.94            | 47.94            |            |
| Female                 | 52.06            | 52.06            | 52.06            | 52.06            | 52.06            | 52.06            |            |
| Race, %                |                  |                  |                  |                  |                  |                  | 1.0000     |
| Mexican American       | 7.78             | 7.78             | 7.78             | 7.78             | 7.78             | 7.78             |            |
| Other Hispanic         | 5.04             | 5.04             | 5.04             | 5.04             | 5.04             | 5.04             |            |
| Non-Hispanic White     | 69.66            | 69.66            | 69.66            | 69.66            | 69.66            | 69.66            |            |
| Non-Hispanic Black     | 10.91            | 10.91            | 10.91            | 10.91            | 10.91            | 10.91            |            |
| Other race             | 6.61             | 6.61             | 6.61             | 6.61             | 6.61             | 6.61             |            |
| Education level, %     |                  |                  |                  |                  |                  |                  | 1.0000     |
| <9th grade             | 5.04             | 5.04             | 5.04             | 5.04             | 5.04             | 5.04             |            |
| 9–11th grade           | 10.14            | 10.14            | 10.14            | 10.14            | 10.14            | 10.14            |            |
| High school            | 23.70            | 23.70            | 23.70            | 23.70            | 23.70            | 23.70            |            |
| College                | 31.53            | 31.53            | 31.53            | 31.53            | 31.53            | 31.53            |            |
| Graduate or above      | 29.59            | 29.59            | 29.59            | 29.59            | 29.59            | 29.59            |            |
| PIR                    | 3.05 ± 1.62      | 3.03 ± 1.75      | 3.03 ± 1.71      | 3.02 ± 1.72      | 3.03 ± 1.71      | 3.04 ± 1.78      | 0.2363     |
| BMI, kg/m <sup>2</sup> | 29.02 ± 6.82     | 29.02 ± 6.82     | 29.03 ± 6.83     | 29.02 ± 6.82     | 29.02 ± 6.83     | 29.02 ± 6.82     | 1.0000     |
| Hypertension, %        |                  |                  |                  |                  |                  |                  | 1.0000     |
| No                     | 62.11            | 62.11            | 62.11            | 62.11            | 62.11            | 62.11            |            |
| Yes                    | 37.89            | 37.89            | 37.89            | 37.89            | 37.89            | 37.89            |            |
| Diabetes, %            |                  |                  |                  |                  |                  |                  | 1.0000     |
| No                     | 86.45            | 86.45            | 86.45            | 86.45            | 86.45            | 86.45            |            |
| Yes                    | 13.55            | 13.55            | 13.55            | 13.55            | 13.55            | 13.55            |            |
| Smoking Status, %      |                  |                  |                  |                  |                  |                  | 1.0000     |
| Never Smoking          | 54.60            | 54.60            | 54.60            | 54.60            | 54.60            | 54.60            |            |
| Quit Smoking           | 23.39            | 23.39            | 23.39            | 23.39            | 23.39            | 23.39            |            |
| Current Smoking        | 22.01            | 22.01            | 22.01            | 22.01            | 22.01            | 22.01            |            |
| Drinking status, %     |                  |                  |                  |                  |                  |                  | 1.0000     |
| Never Drinking         | 19.90            | 19.90            | 19.90            | 19.90            | 19.90            | 19.90            |            |
| 1-5 drinks/month       | 41.14            | 41.14            | 41.14            | 41.14            | 41.14            | 41.14            |            |
| 5-10 drinks/month      | 7.58             | 7.58             | 7.58             | 7.58             | 7.58             | 7.58             |            |
| 10+ drinks/month       | 14.05            | 14.05            | 14.05            | 14.05            | 14.05            | 14.05            |            |
| Unknown                | 17.33            | 17.33            | 17.33            | 17.33            | 17.33            | 17.33            |            |
| FBG, mmol/L            | 5.50 ± 1.79      | 5.49 ± 1.78      | 5.49 ± 1.78      | 5.49 ± 1.78      | 5.50 ± 1.78      | 5.49 ± 1.78      | 0.9992     |
| HBA1c, %               | 5.60 ± 0.90      | 5.61 ± 0.90      | 5.61 ± 0.90      | 5.61 ± 0.90      | 5.61 ± 0.90      | 5.61 ± 0.90      | 0.9906     |
| TC, mmol/L             | 5.07 ± 1.08      | 5.07 ± 1.08      | 5.07 ± 1.08      | 5.07 ± 1.09      | 5.07 ± 1.08      | 5.07 ± 1.08      | 0.9905     |
| Triglyceride, mmol/L   | 1.71 ± 1.48      | 1.71 ± 1.47      | 1.71 ± 1.47      | 1.71 ± 1.47      | 1.71 ± 1.47      | 1.71 ± 1.47      | 0.9971     |

|                                  |                     |                     |                     |                     |                     |                     |        |
|----------------------------------|---------------------|---------------------|---------------------|---------------------|---------------------|---------------------|--------|
| ALT, U/L                         | 25.34 ±<br>19.79    | 25.22 ±<br>19.51    | 25.19 ±<br>19.50    | 25.23 ±<br>19.51    | 25.21 ±<br>19.50    | 25.19 ±<br>19.48    | 0.9377 |
| BUN, mg/dL                       | 4.85 ± 1.95         | 4.86 ± 1.95         | 4.87 ± 1.96         | 4.87 ± 1.96         | 4.87 ± 1.96         | 4.87 ± 1.96         | 0.8316 |
| UA, umol/L                       | 322.67 ±<br>83.09   | 323.12 ±<br>83.44   | 322.96 ±<br>83.48   | 322.66 ±<br>83.23   | 322.54 ±<br>83.31   | 322.63 ±<br>83.18   | 0.9394 |
| SCR, umol/L                      | 79.17 ±<br>31.74    | 79.16 ±<br>31.45    | 79.19 ±<br>31.44    | 79.18 ±<br>31.43    | 79.14 ±<br>31.44    | 79.21 ±<br>31.48    | 0.9997 |
| eGFR, mL/min/1.73m <sup>2</sup>  | 91.81 ±<br>23.85    | 91.95 ±<br>24.31    | 92.03 ±<br>24.27    | 92.09 ±<br>24.33    | 92.05 ±<br>24.33    | 92.04 ±<br>24.40    | 0.6909 |
| Energy, kcal                     | 2099.99 ±<br>826.68 | 1.0000 |
| DDA, g/d                         | 0.48 ± 0.37         | 0.48 ± 0.37         | 0.48 ± 0.37         | 0.48 ± 0.37         | 0.48 ± 0.37         | 0.48 ± 0.37         | 1.0000 |
| Protein, g/d                     | 82.19 ±<br>34.87    | 1.0000 |
| Carbohydrate, g/d                | 250.88 ±<br>106.99  | 1.0000 |
| Fiber, g/d                       | 16.83 ± 8.92        | 16.83 ± 8.92        | 16.83 ± 8.92        | 16.83 ± 8.92        | 16.83 ± 8.92        | 16.83 ± 8.92        | 1.0000 |
| Total fat, g/d                   | 81.10 ±<br>38.30    | 1.0000 |
| saturated fatty acids, g/d       | 26.52 ±<br>13.81    | 1.0000 |
| monounsaturated fatty acids, g/d | 29.07 ±<br>14.52    | 1.0000 |
| polyunsaturated fatty acids, g/d | 18.27 ± 9.86        | 18.27 ± 9.86        | 18.27 ± 9.86        | 18.27 ± 9.86        | 18.27 ± 9.86        | 18.27 ± 9.86        | 1.0000 |
| Vitamin E, mg/d                  | 8.32 ± 5.47         | 8.32 ± 5.47         | 8.32 ± 5.47         | 8.32 ± 5.47         | 8.32 ± 5.47         | 8.32 ± 5.47         | 1.0000 |
| Vitamin K, µg/d                  | 113.29 ±<br>216.73  | 1.0000 |
| Vitamin A, µg/d                  | 646.30 ±<br>561.79  | 1.0000 |
| Vitamin B6, mg/d                 | 2.09 ± 1.30         | 2.09 ± 1.30         | 2.09 ± 1.30         | 2.09 ± 1.30         | 2.09 ± 1.30         | 2.09 ± 1.30         | 1.0000 |
| Vitamin C, mg/d                  | 82.98 ±<br>76.74    | 1.0000 |

Abbreviations: PIR Poverty income ratio, BMI body mass index, FPG fasting plasma glucose, HbA1c hemoglobin A1c, BUN Blood urea nitrogen, TC total cholesterol, UA uric acid, SCR Serum creatinine, eGFR estimated glomerular filtration rate, ALT Alanine aminotransferase, DDA Dietary decanoic acid.

\* Data are presented as mean ± standard deviation and numbers (%) as appropriate.

**Table S2. Relative odds of CAD according to DDA in different models among American adults based on multiple imputed data**

| Exposure    | Coronary artery disease (OR (95% CI)) |                   |                   |                   |                   |                   |                   |                   |                   |                   |
|-------------|---------------------------------------|-------------------|-------------------|-------------------|-------------------|-------------------|-------------------|-------------------|-------------------|-------------------|
|             | Model 1                               |                   |                   |                   |                   | Model 2           |                   |                   |                   |                   |
|             | MI.1                                  | MI.2              | MI.3              | MI.4              | MI.5              | MI.1              | MI.2              | MI.3              | MI.4              | MI.5              |
| DDA         | 0.62 (0.55, 0.70)                     | 0.62 (0.55, 0.70) | 0.62 (0.55, 0.70) | 0.62 (0.55, 0.70) | 0.62 (0.55, 0.70) | 0.76 (0.63, 0.91) | 0.75 (0.63, 0.90) | 0.76 (0.63, 0.91) | 0.76 (0.63, 0.91) | 0.76 (0.63, 0.91) |
| Lg DDA      | 0.71 (0.65, 0.77)                     | 0.71 (0.65, 0.77) | 0.71 (0.65, 0.77) | 0.71 (0.65, 0.77) | 0.71 (0.65, 0.77) | 0.80 (0.71, 0.91) | 0.80 (0.71, 0.91) | 0.80 (0.71, 0.91) | 0.80 (0.71, 0.91) | 0.80 (0.71, 0.91) |
| DDA Tertile |                                       |                   |                   |                   |                   |                   |                   |                   |                   |                   |
| T1          | 1.0                                   | 1.0               | 1.0               | 1.0               | 1.0               | 1.0               | 1.0               | 1.0               | 1.0               | 1.0               |
| T2          | 0.79 (0.72, 0.87)                     | 0.79 (0.72, 0.87) | 0.79 (0.72, 0.87) | 0.79 (0.72, 0.87) | 0.79 (0.72, 0.87) | 0.87 (0.78, 0.96) | 0.86 (0.77, 0.96) | 0.87 (0.78, 0.97) | 0.86 (0.78, 0.96) | 0.87 (0.78, 0.96) |
| T3          | 0.70 (0.63, 0.77)                     | 0.70 (0.63, 0.77) | 0.70 (0.63, 0.77) | 0.70 (0.63, 0.77) | 0.70 (0.63, 0.77) | 0.82 (0.72, 0.94) | 0.81 (0.71, 0.93) | 0.82 (0.72, 0.94) | 0.82 (0.72, 0.94) | 0.82 (0.72, 0.94) |

Abbreviations: MI multiple imputed; Lg DDA value was log10-transformed. Model 1 adjusts for none; Model 2 adjusts for sex, age, race, education levels, PIR, BMI, hypertension, Diabetes, Smoking Status, Drinking Status, TC, triglyceride, BUN, UA, SCR, eGFR, ALT, Energy, Protein, Carbohydrate, Fiber, Total fat, and multivitamin.

**Table S3. Pool estimates from multiple imputed data**

| Data             |              |       |         |       |           |          |        |       |        |       |
|------------------|--------------|-------|---------|-------|-----------|----------|--------|-------|--------|-------|
| Var.             | beta 1       | se 1  | beta 2  | se 2  | beta 3    | se 3     | beta 4 | se 4  | beta 5 | se 5  |
| DDA              | -0.274       | 0.094 | -0.288  | 0.091 | -0.274    | 0.094    | -0.274 | 0.094 | -0.274 | 0.094 |
| lg DDA           | -0.223       | 0.063 | -0.223  | 0.063 | -0.223    | 0.063    | -0.223 | 0.063 | -0.223 | 0.063 |
| DDA Tertile      |              |       |         |       |           |          |        |       |        |       |
| T1               | Refer        | Refer | Refer   | Refer | Refer     | Refer    | Refer  | Refer | Refer  | Refer |
| T2               | -0.139       | 0.053 | -0.151  | 0.056 | -0.139    | 0.057    | -0.151 | 0.053 | -0.139 | 0.053 |
| T3               | -0.198       | 0.068 | -0.211  | 0.069 | -0.198    | 0.068    | -0.198 | 0.068 | -0.198 | 0.068 |
| Pooled estimates |              |       |         |       |           |          |        |       |        |       |
| Var.             | Coefficients | Se    | P value | OR    | 95%CI low | 95%CI up |        |       |        |       |

|             |        |       |        |       |       |       |
|-------------|--------|-------|--------|-------|-------|-------|
| DDA         | -0.277 | 0.093 | 0.003  | 0.758 | 0.631 | 0.910 |
| lg DDA      | -0.223 | 0.063 | <0.001 | 0.800 | 0.707 | 0.906 |
| DDA Tertile |        |       |        |       |       |       |
| T1          | Refer  | Refer | Refer  | Refer | Refer | Refer |
| T2          | -0.144 | 0.055 | 0.008  | 0.866 | 0.778 | 0.964 |
| T3          | -0.201 | 0.068 | 0.003  | 0.818 | 0.715 | 0.935 |

Abbreviations: Lg DDA value was log10-transformed. Adjusts for sex, age, race, education levels, PIR, BMI, hypertension, Diabetes, Smoking Status, Drinking Status, TC, triglyceride, BUN, UA, SCR, eGFR, ALT, Energy, Protein, Carbohydrate, Fiber, Total fat, and multivitamin.
